# Supplementary material
Source: Springer Nature journal article supplement (https://www.springermedizin.de/resource/supplementary/12889_2007_1116_MOESM1_ESM.pdf/9502488)

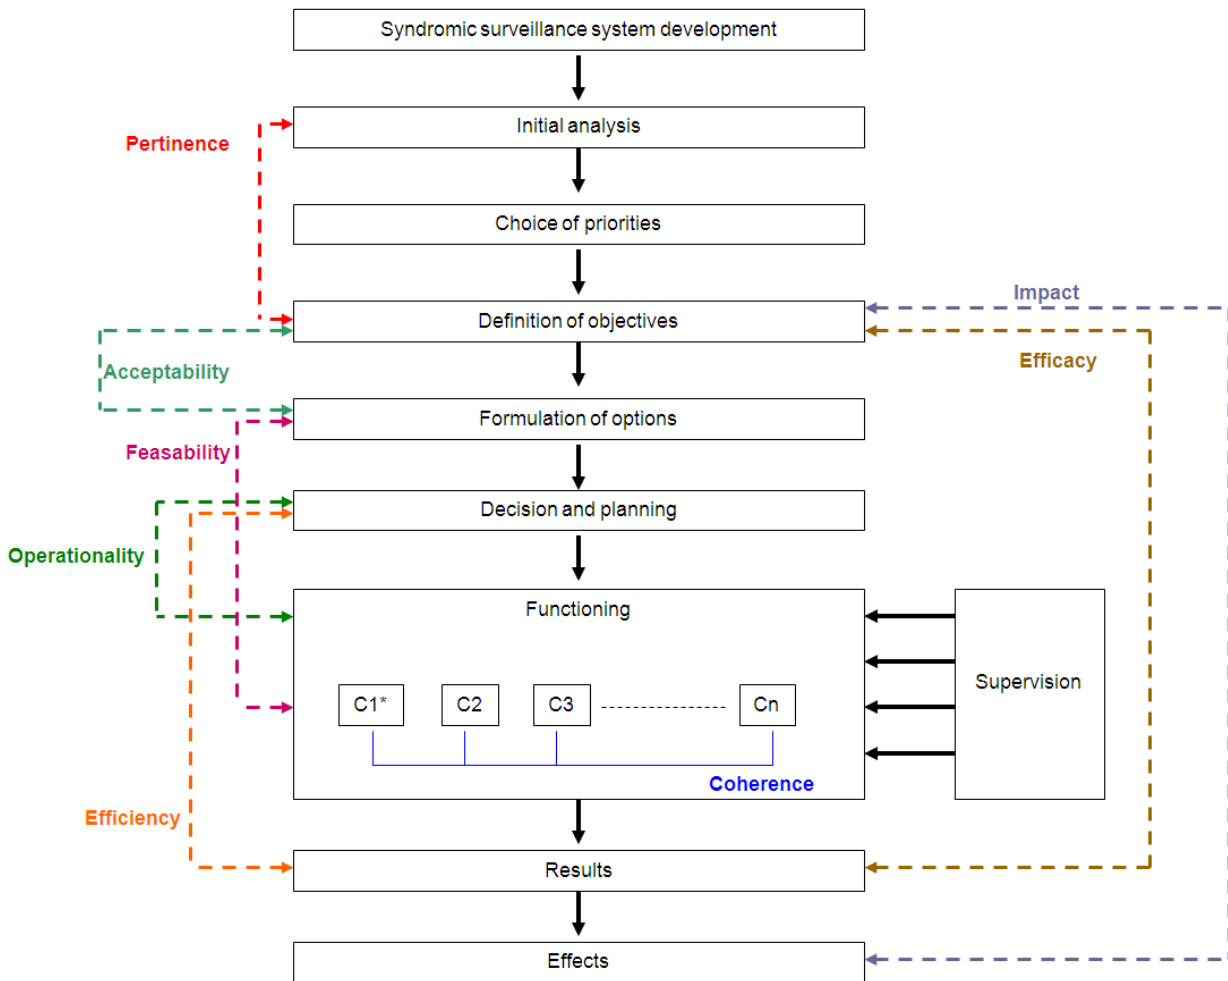

C1 to Cn : components of the syndromic surveillance system

Supplement: MOESM1 [file 9502488]
